# Supplementary material for: Activation of cryptic metabolite production through gene disruption: Dimethyl furan-2,4-dicarboxylate produced by Streptomyces sahachiroi
Source: publisher site journal article supplement (doi:10.3762/bjoc.9.205), 2013-08-29
Supplement: Additional file 1 [file 1860-5397-9-205-S1.pdf]

# Supporting Information

for

## **Activation of cryptic metabolite production through gene disruption: Dimethyl furan-2,4-dicarboxylate produced by *Streptomyces sahachiroi***

Dinesh Simkhada, Huitu Zhang, Shogo Mori, Howard Williams, Coran M. H. Watanabe\*

Address: Texas A&M University, Department of Chemistry, College Station, TX 77843,  
USA

Email: Coran M. H. Watanabe – [watanabe@chem.tamu.edu](mailto:watanabe@chem.tamu.edu)

\* Corresponding author

**Details on genetic knockout, Southern blot analysis,  
LC–MS analysis and NMR data**

## Contents

|                                                                                                                                                                       |        |
|-----------------------------------------------------------------------------------------------------------------------------------------------------------------------|--------|
| <b>Figure S1:</b> Strategy for genetic knockout of <i>aziA2</i> .....                                                                                                 | S3     |
| <b>Figure S2:</b> Confirmation of disruptants: Southern blot.....                                                                                                     | S4     |
| <b>Figure S3:</b> NMR profile analysis of dimethyl furan-2,4-dicarboxylate (in order: <sup>1</sup> H NMR, <sup>13</sup> C NMR, Dept 90, Dept 135, HMBC and HMQC)..... | S5–S10 |
| <b>Figure S4:</b> LC–APCIMS profile of dimethyl furan-2,4-dicarboxylate.....                                                                                          | S11    |
| <b>Figure S5:</b> LC–APCIMS/MS profile of dimethyl furan-2,4-dicarboxylate.....                                                                                       | S11    |
| <b>Figure S6:</b> GC–MS profile of dimethyl furan-2,4-dicarboxylate.....                                                                                              | S12    |
| <br>                                                                                                                                                                  |        |
| <b>Supplemental experimental procedures</b> .....                                                                                                                     | S13    |
| <b>Table S1:</b> List of strains and plasmids used in this study.....                                                                                                 | S13    |
| <b>Table S2:</b> List of primers used in this study.....                                                                                                              | S14    |
| <b>References</b> .....                                                                                                                                               | S15    |

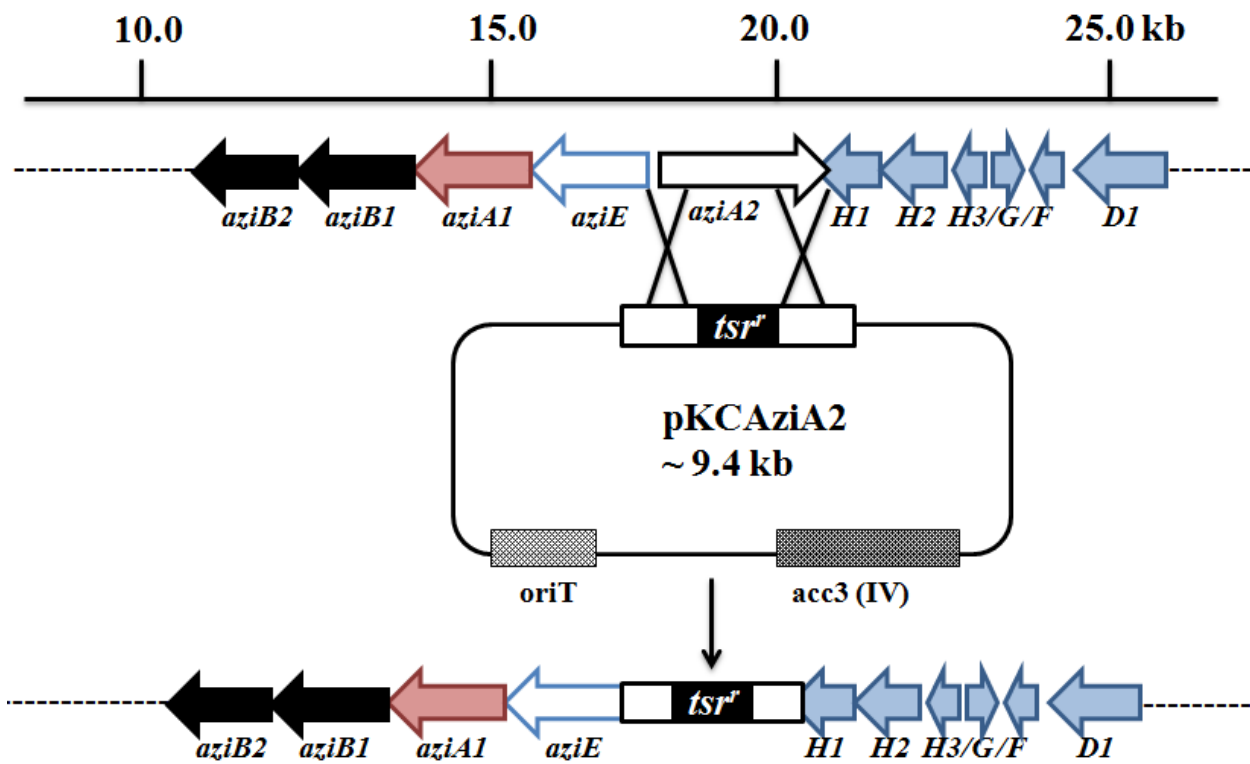

**Figure S1:** Strategy for genetic knockout of *aziA2*.

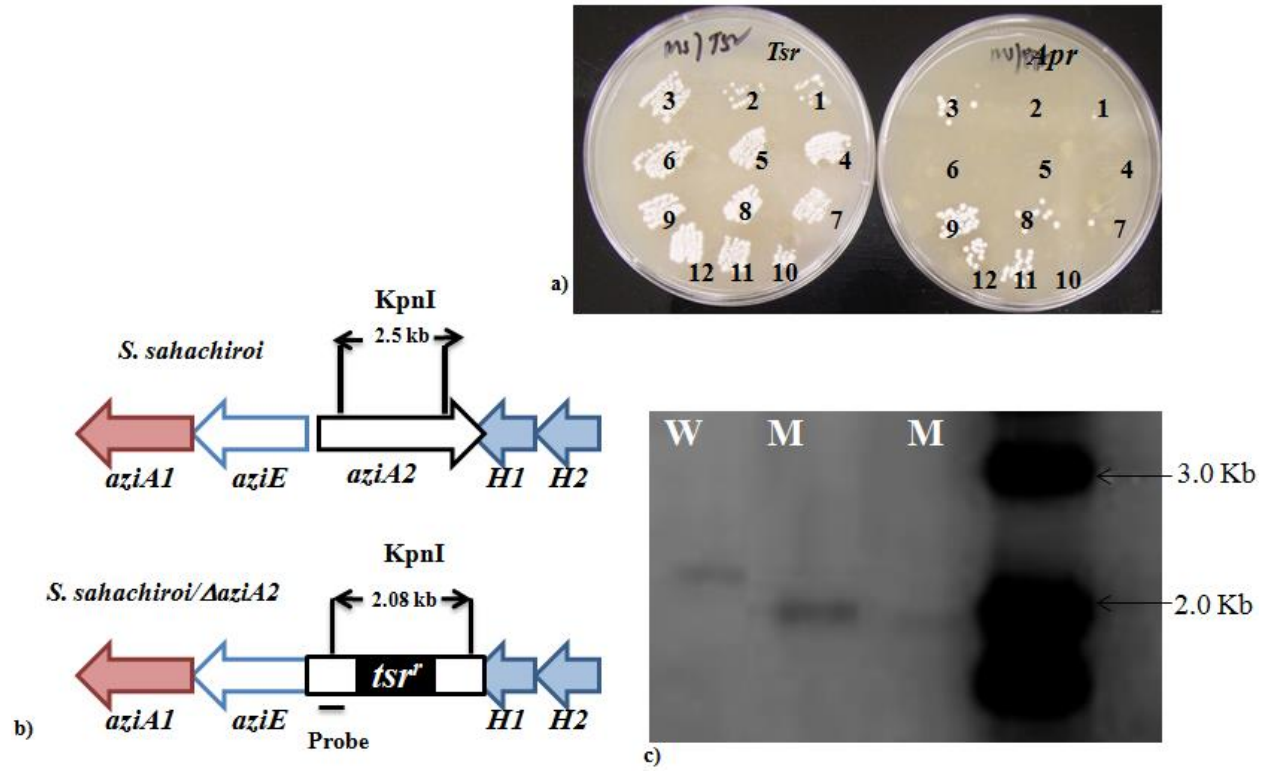

**Figure S2:** Confirmation of *aziA2* knockout: a) Screening for positive colonies, b) Strategy for Southern hybridization, c) Southern blot; W: wild type, M: mutants.

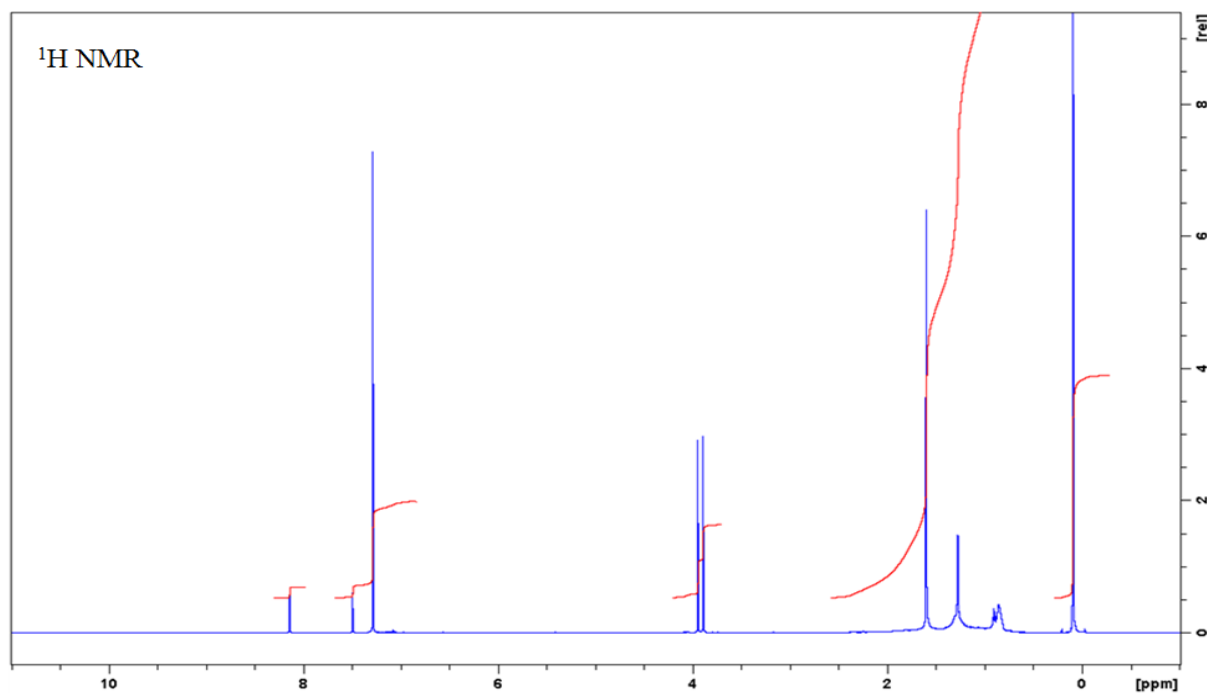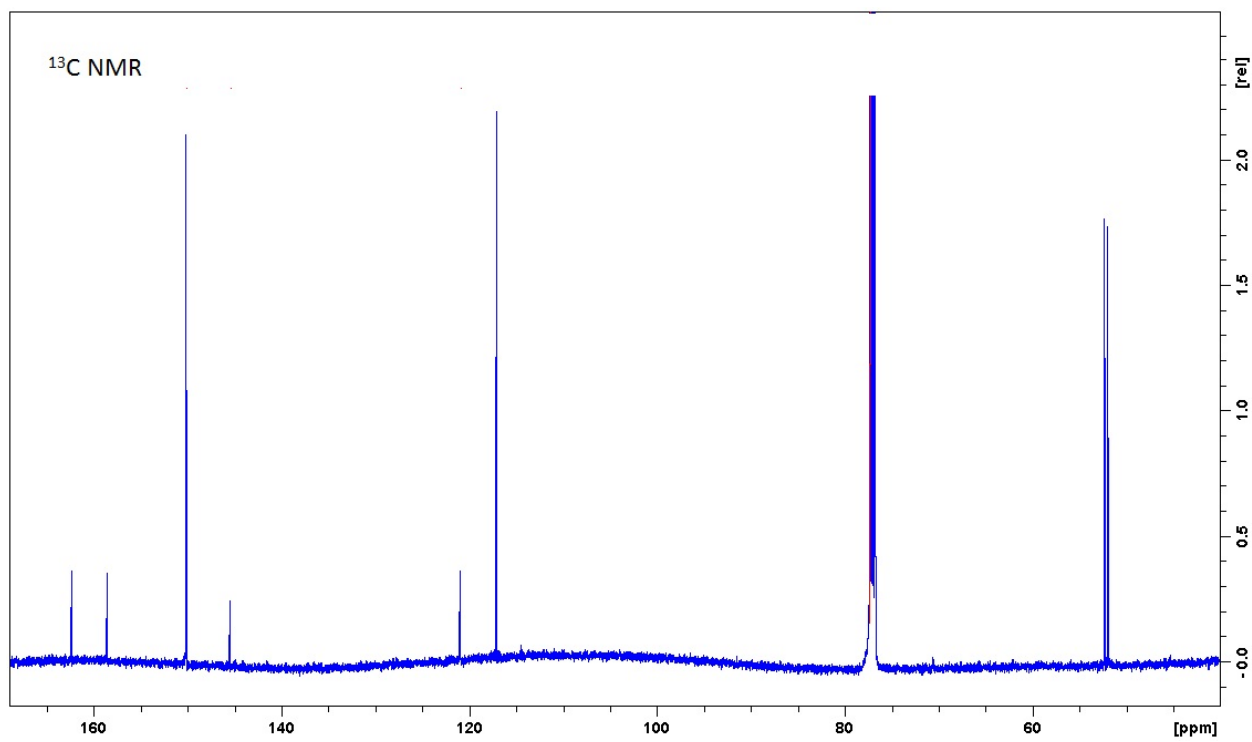

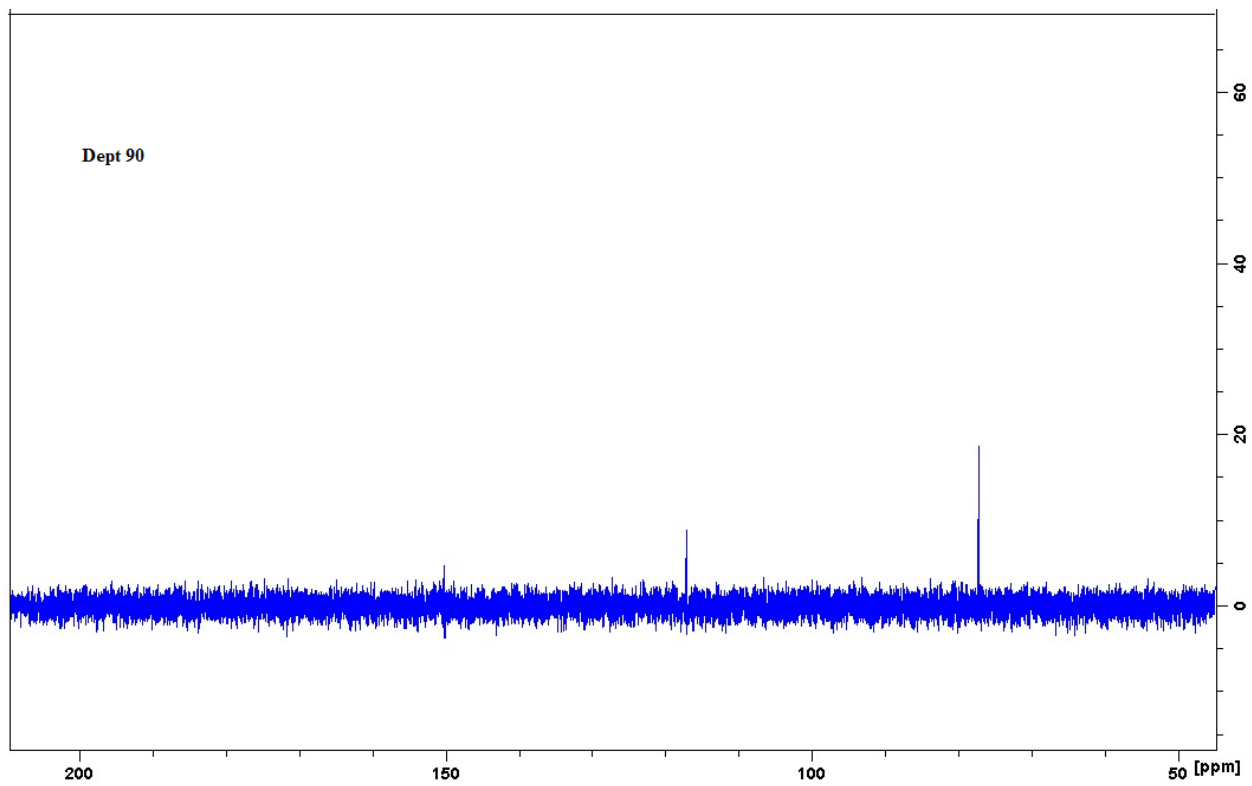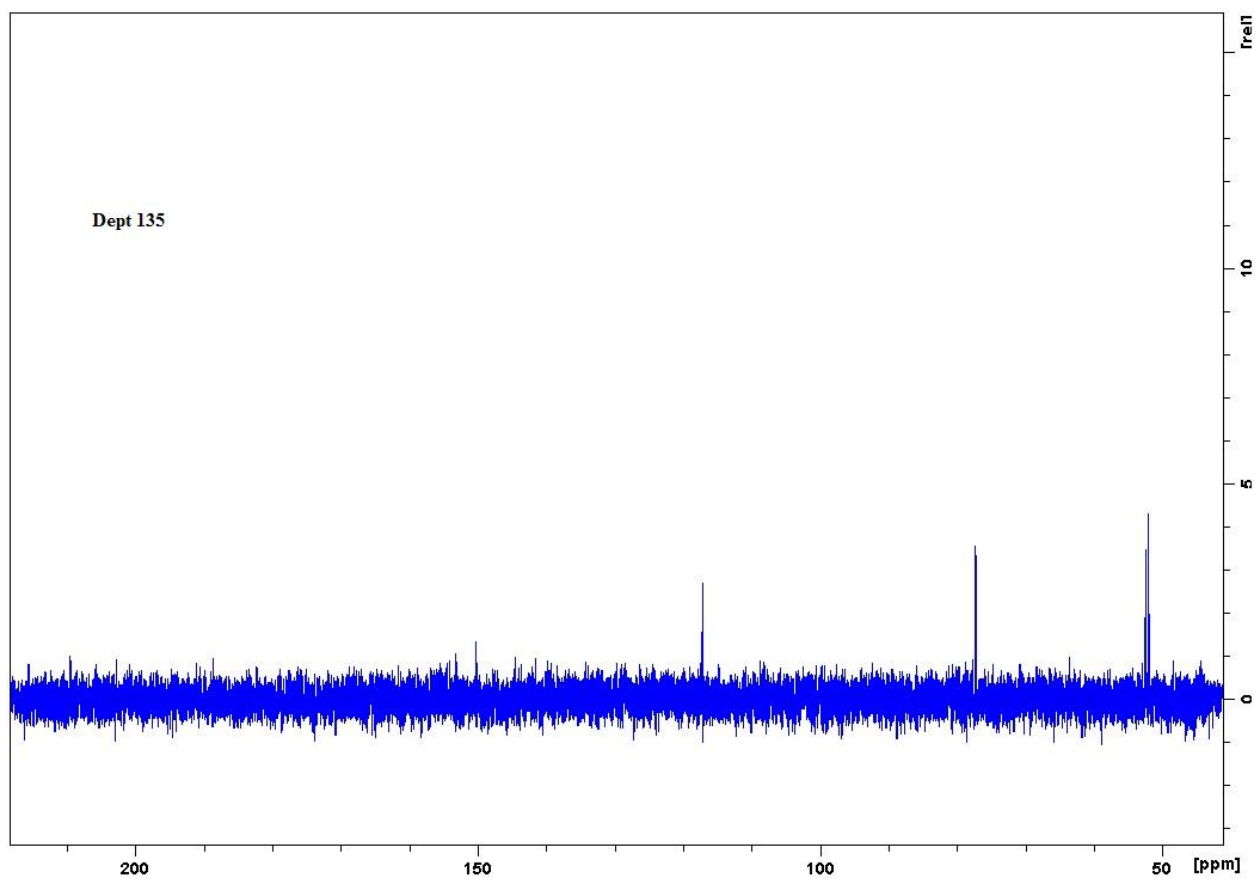

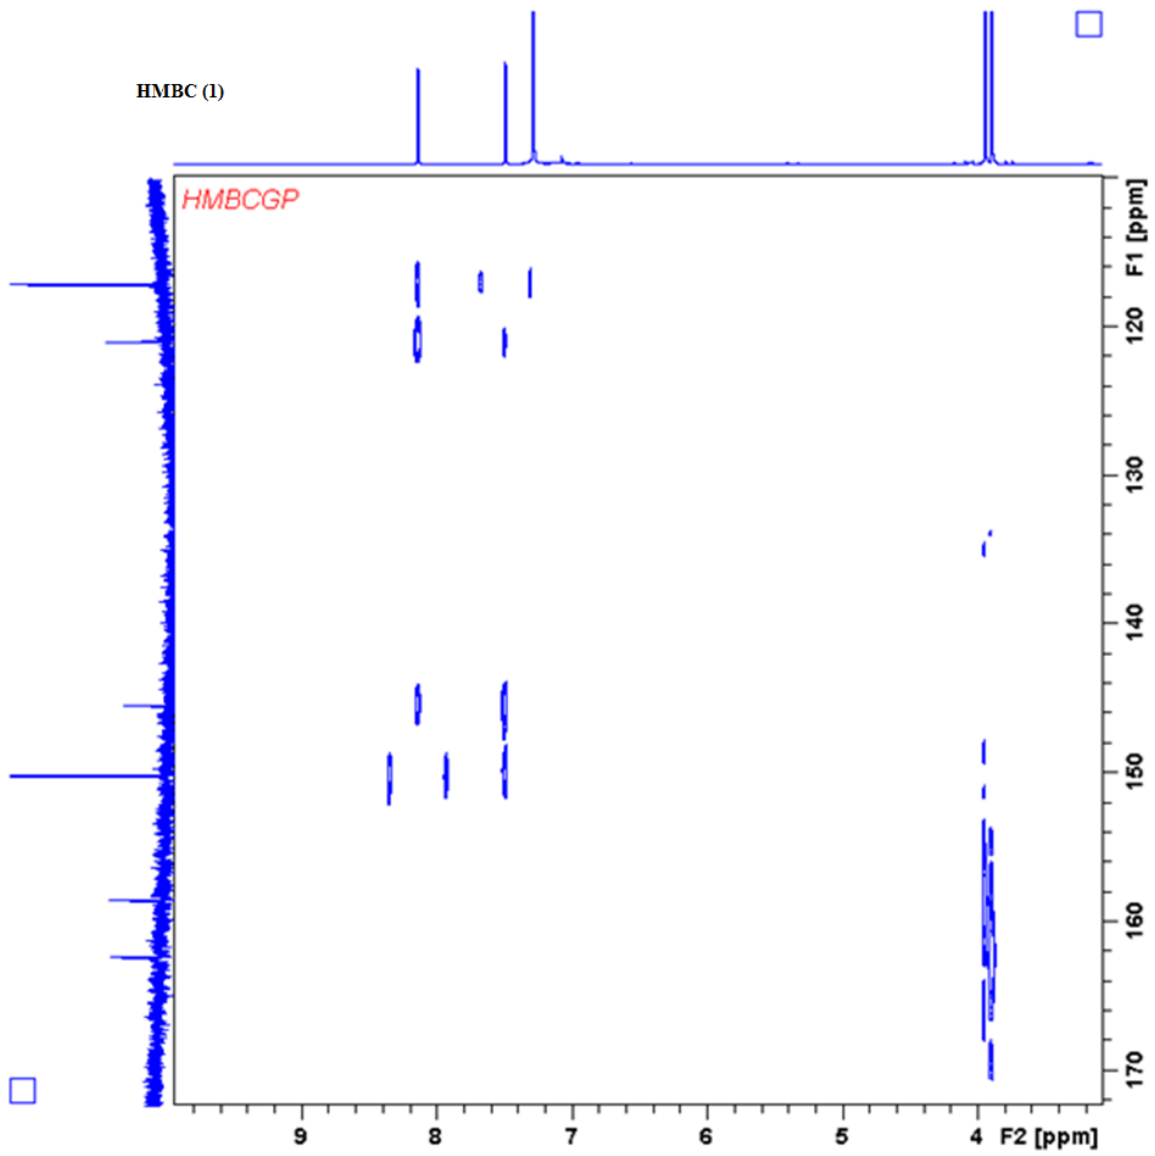

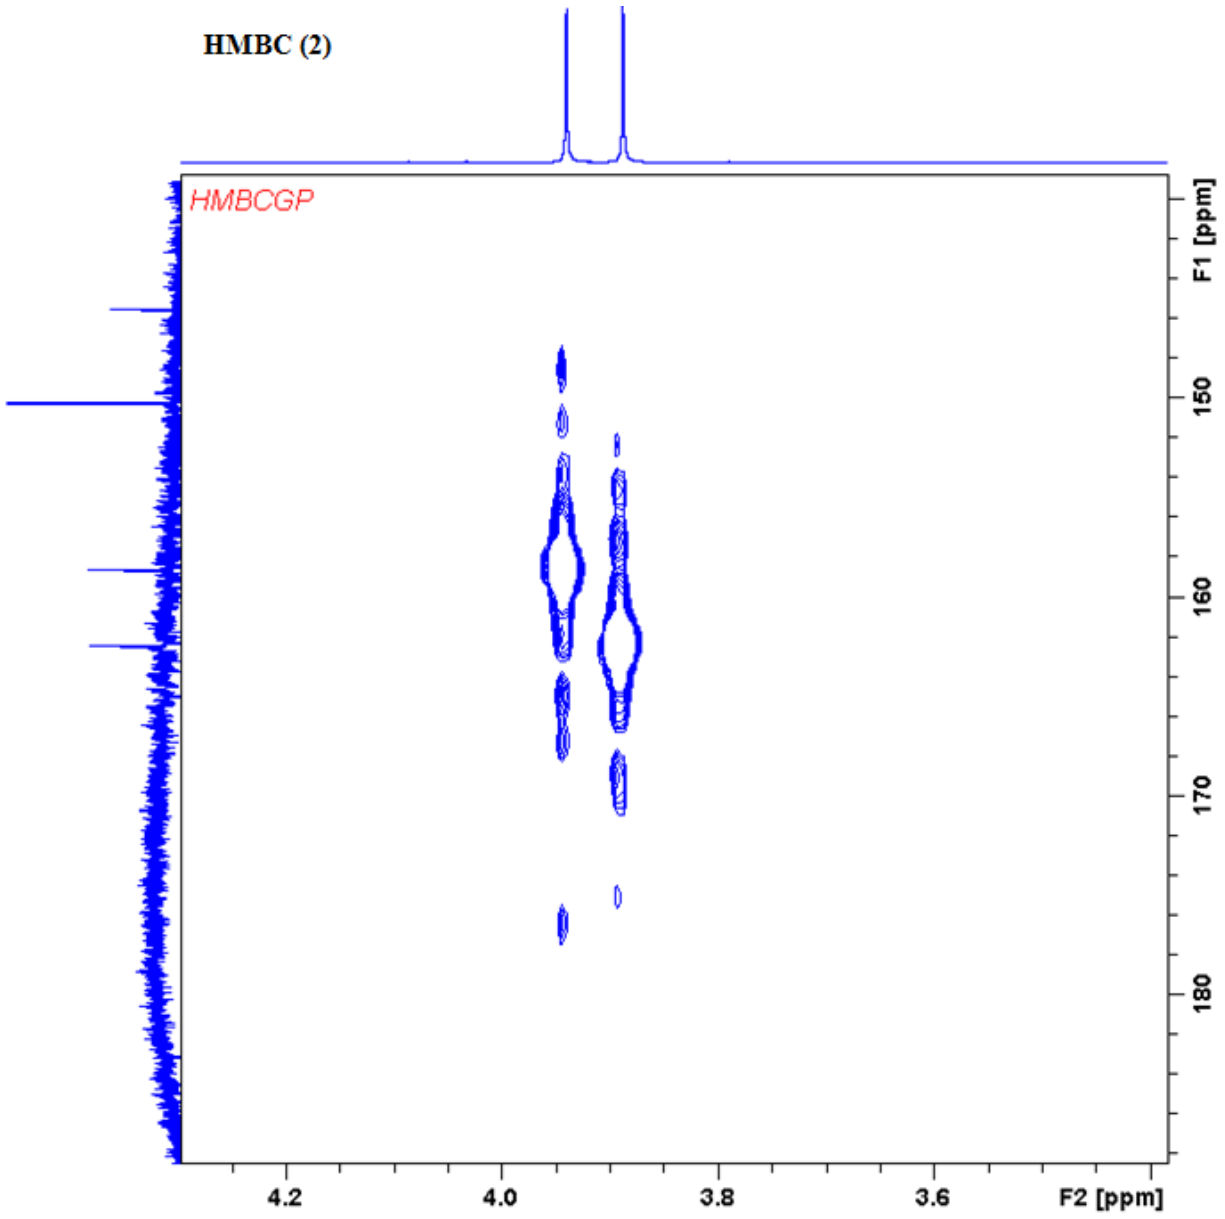



HMBC (3)

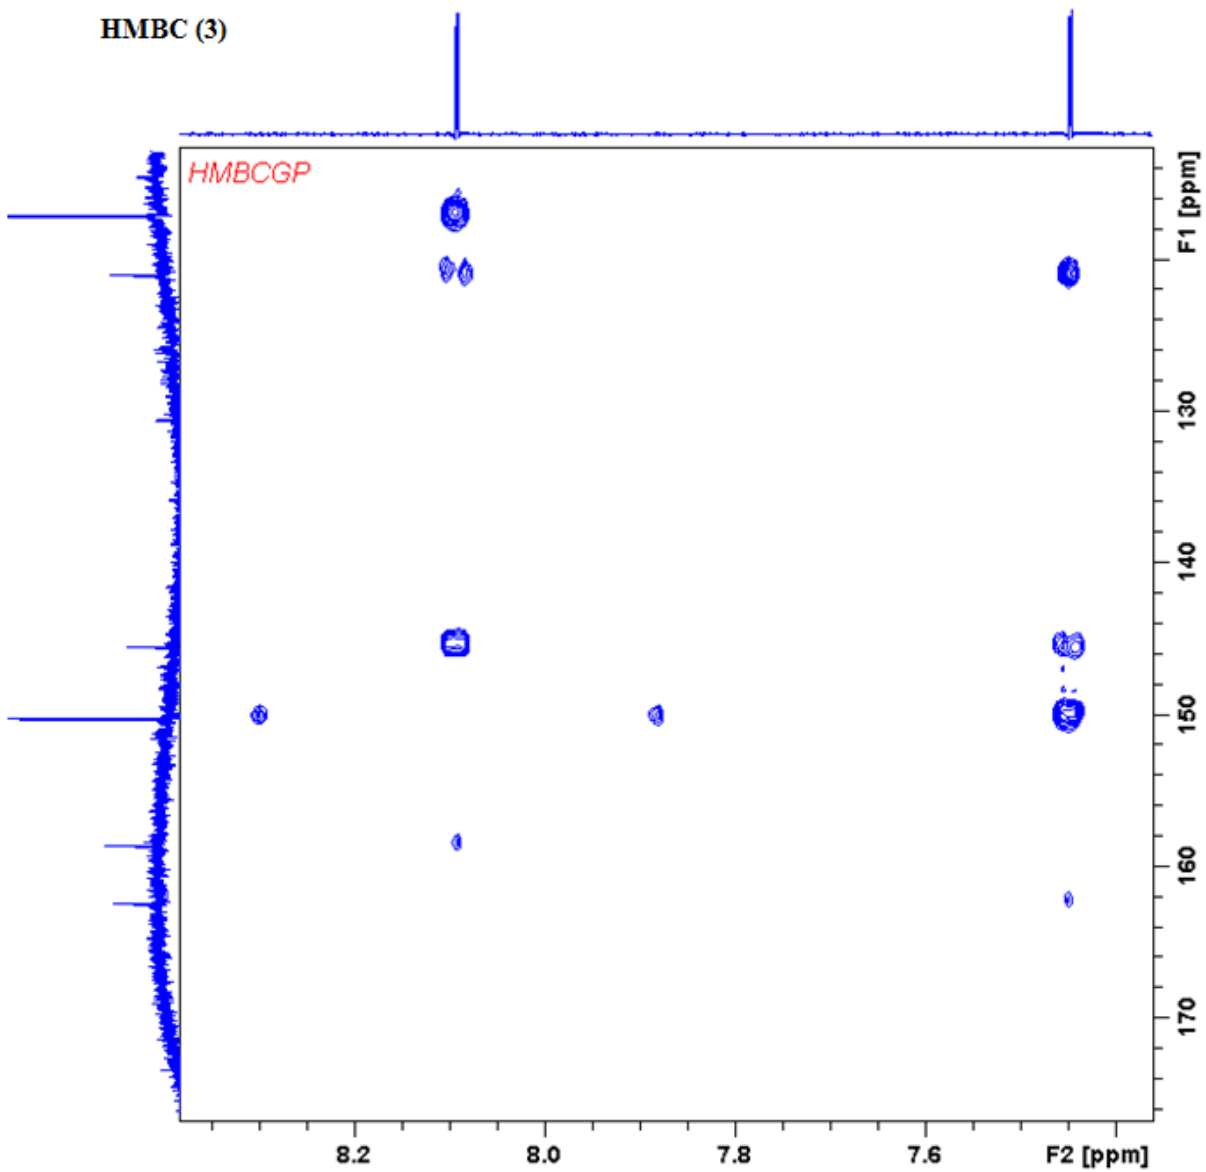

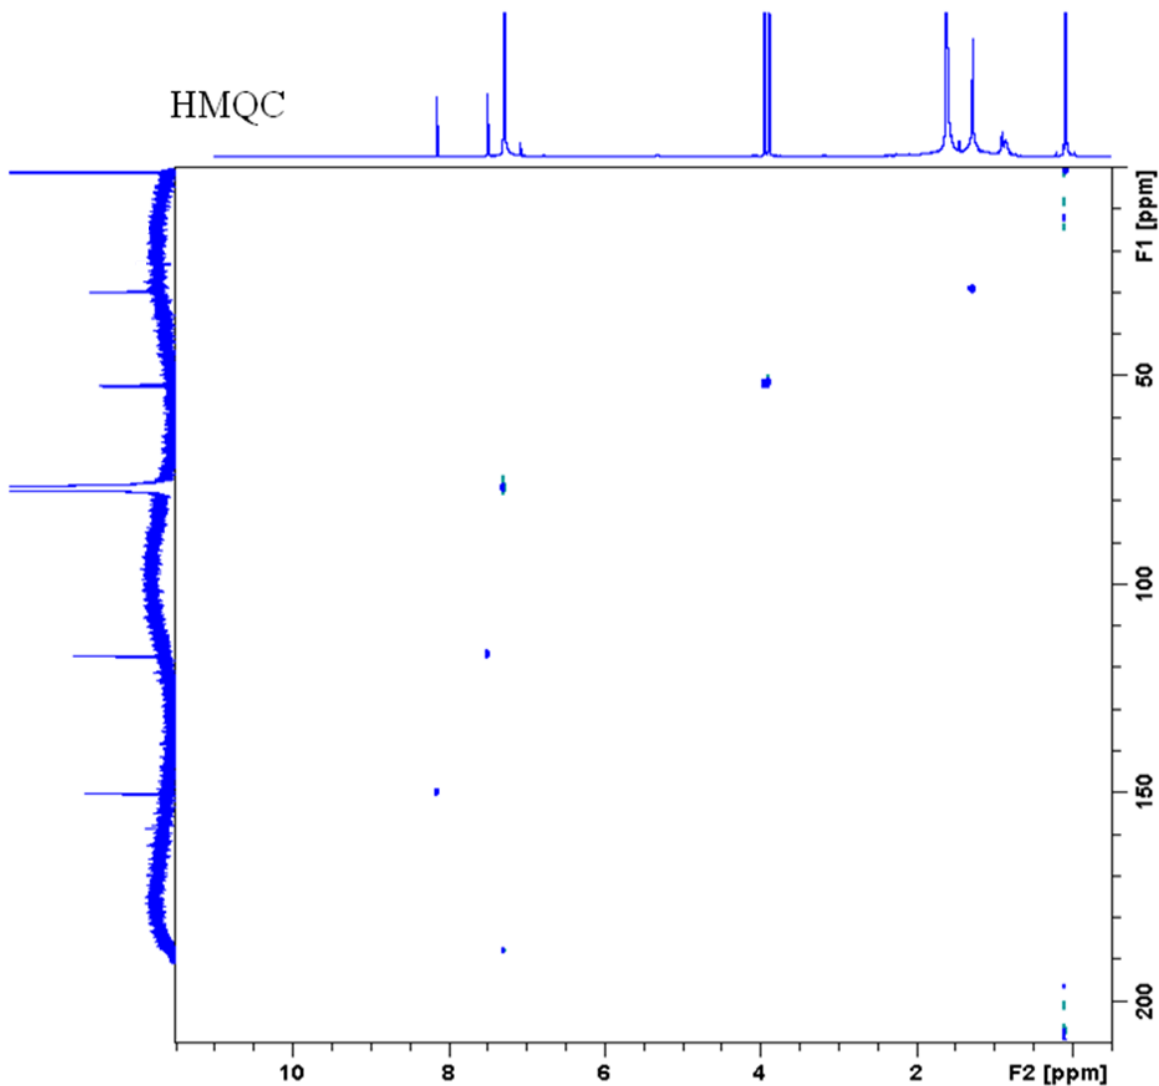

**Figure S3:** NMR Profile for dimethyl furan-2,4-dicarboxylate (in order:  $^1\text{H}$  NMR,  $^{13}\text{C}$  NMR, Dept 90, Dept 135, HMBC (1,2 and 3) and HMQC).

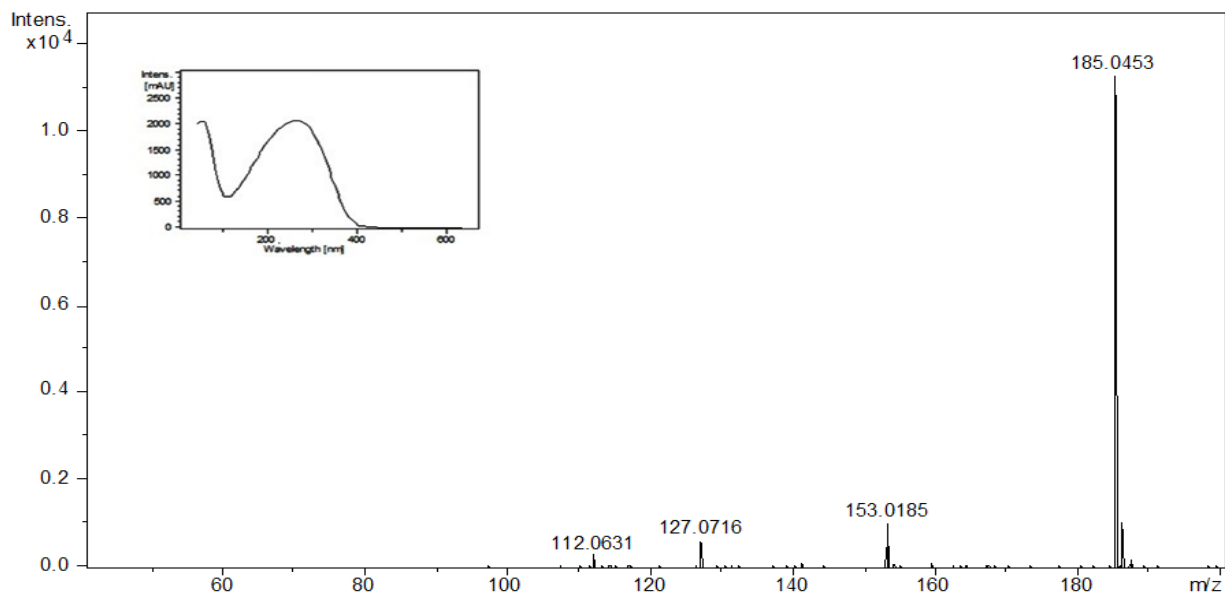

**Figure S4:** LC-APCIMS profile of dimethyl furan-2,4-dicarboxylate.

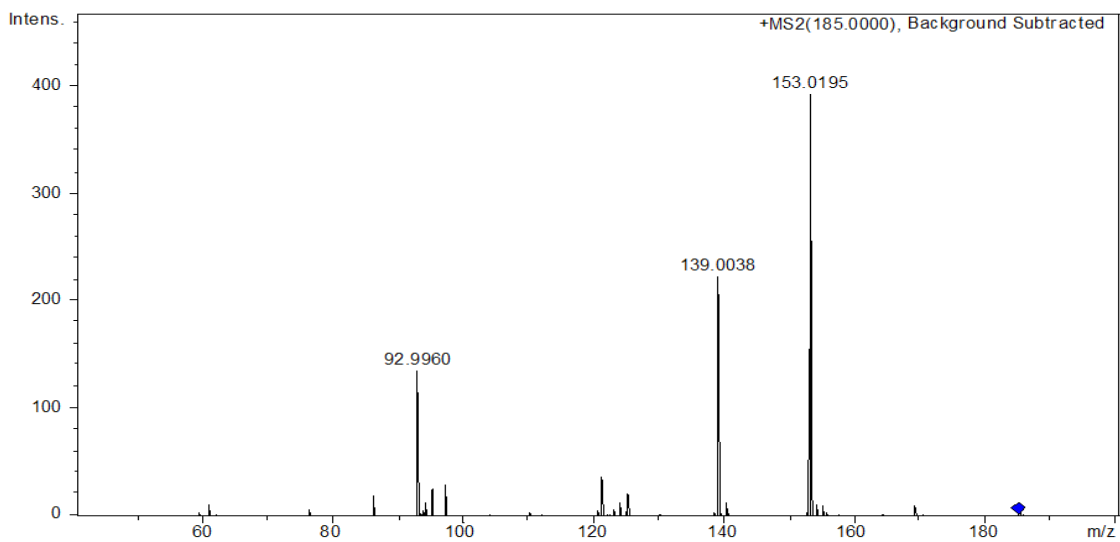

**Figure S5:** LC-APCIMS/MS profile of dimethyl furan-2,4-dicarboxylate.

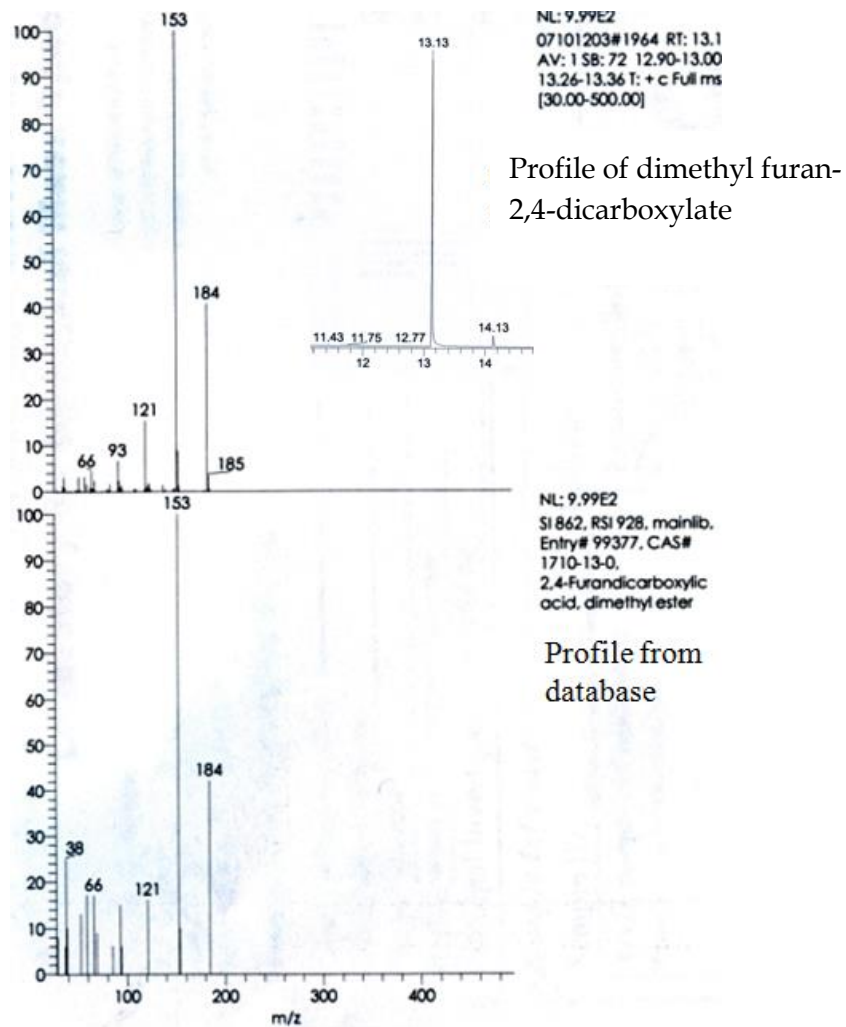

Figure S6: GC-MS profile of dimethyl furan-2,4-dicarboxylate.

## Supplemental experimental procedures

### Bacterial strains, plasmids and culture conditions

*Escherichia coli* (*E. coli*) strains (XL1 Blue and DH10B) were cultured in Luria Bertani (LB) medium at 37 °C. *E. coli* XL1 Blue was routinely used as a host for the recombinant plasmids. *E. coli* S17-1 was used as a donor strain for conjugative transfer of mobilizable plasmids into *Streptomyces sahachiroi*. The parental strain *S. sahachiroi* was cultured at 28 °C in R2YE medium [1] for 2–3 days for the preparation of genomic DNA. pGEM-T Easy (Promega, USA) was used as a cloning vector and pKC1139 was used as disruption vector. All of the bacterial strains and a list of vectors and recombinant plasmids including their relevant sources are provided in Table S1.

**Table S1: List of strains and plasmids used in this study.**

| Strains/Plasmids                     | Relevant characteristics                                                                                                                     | References                        |
|--------------------------------------|----------------------------------------------------------------------------------------------------------------------------------------------|-----------------------------------|
| <b>Strains</b>                       |                                                                                                                                              |                                   |
| <i>E. coli</i> XL1 Blue              | <i>recA1 endA1 gyrA96 thi-1 hsdR17 supE44 relA1 lac</i> [F' <i>proAB lacI<sup>q</sup> Z DM15 Tn10</i> (Tet <sup>r</sup> )]                   | Stratagene La Jolla, CA, USA      |
| <i>E. coli</i> S17-1                 | <i>recA1 pro thi</i> ; has the <i>tra</i> genes from plasmid RP4 integrated in the chromosome                                                | Simon <i>et. al.</i> , 1983 [2]   |
| <i>E. coli</i> S17-1/pKC-AziA2       | <i>recA1 pro thi</i> ; has the <i>tra</i> genes from plasmid RP4 integrated in the chromosome with <i>aziA2</i> disruption plasmid pKC-AziA2 | This study                        |
| <i>Streptomyces sahachiroi</i>       | Azinomycin B producer, wild type strain                                                                                                      | ATCC                              |
| <i>S. sahachiroi</i> /Δ <i>aziA2</i> | <i>Streptomyces sahachiroi</i> with deletion of <i>aziA2</i>                                                                                 | This study                        |
| <b>Plasmids</b>                      |                                                                                                                                              |                                   |
| pGEM <sup>®</sup> T-easy vector      | <i>E. coli</i> general cloning vector, amp <sup>r</sup>                                                                                      | Promega, USA                      |
| pKC1139                              | <i>Streptomyces-E. coli</i> bifunctional vector, Apr <sup>r</sup>                                                                            | Bierman <i>et. al.</i> , 1992 [3] |
| pKC-AziA2                            | Disruption recombinant plasmid for <i>aziA2</i>                                                                                              | This study                        |

**Table S2: List of primers used in this study**

| <b>Primers</b>                           | <b>Sequence (5'-3')*</b>                |
|------------------------------------------|-----------------------------------------|
| <b>Gene disruption primers</b>           |                                         |
| aziA2UF                                  | <u>AAGCTT</u> GACTACGAAGACTACATGCCCC    |
| aziA2UR                                  | <u>TCTAGAGT</u> CGGCGAGGTCCGGTGCGCCC    |
| aziA2DF                                  | <u>TCT AGAGT</u> CCCAGACCCTGCTGATGCAGG  |
| aziA2DR                                  | <u>GAATTC</u> AGGGACCGCGGCTCCCGCTCCGT   |
| TsrF                                     | <u>TCTAGAGAT</u> CAAGGCGAATACTTCATATG   |
| TsrR                                     | <u>TCTAGA</u> ACGAATCGAGGTTCGAGGAACCGAG |
| <b>Primers for detection of genotype</b> |                                         |
| aziA2 probe-F                            | TGATGCAGGAGCTGAGCACCGCCT                |
| aziA2 Probe R                            | GACGATCTCCGCGAAGGGCAGCT                 |

\* Restriction sites are underlined

## References

1. Kieser, T.; Bibb, M.; Butter, M.; Chater, K. F.; Hopwood, D. A., *Practical Streptomyces Genetics*. The John Innes Foundation: Norwich, UK, 2000.
2. Simon, R., Priefer U. and Pühler A., A Broad Host Range Mobilization System for In vivo Genetic Engineering: Transposon Mutagenesis in Gram Negative Bacteria. *Biotechnol.* **1983**, *1*, 784–791.
3. Bierman, M.; Logan, R.; O'Brien, K.; Seno, E. T.; Nagaraja Rao, R.; Schonher, B. E., Plasmid Cloning Vectors for the Conjugal Transfer of DNA from *Escherichia coli* to *Streptomyces spp.* *Gene* **1992**, *116*, 43–49.
